# Supplementary material
Source: Springer Nature journal article supplement (https://www.springermedizin.de/resource/supplementary/12936_2012_2502_MOESM4_ESM.pdf/9543128)

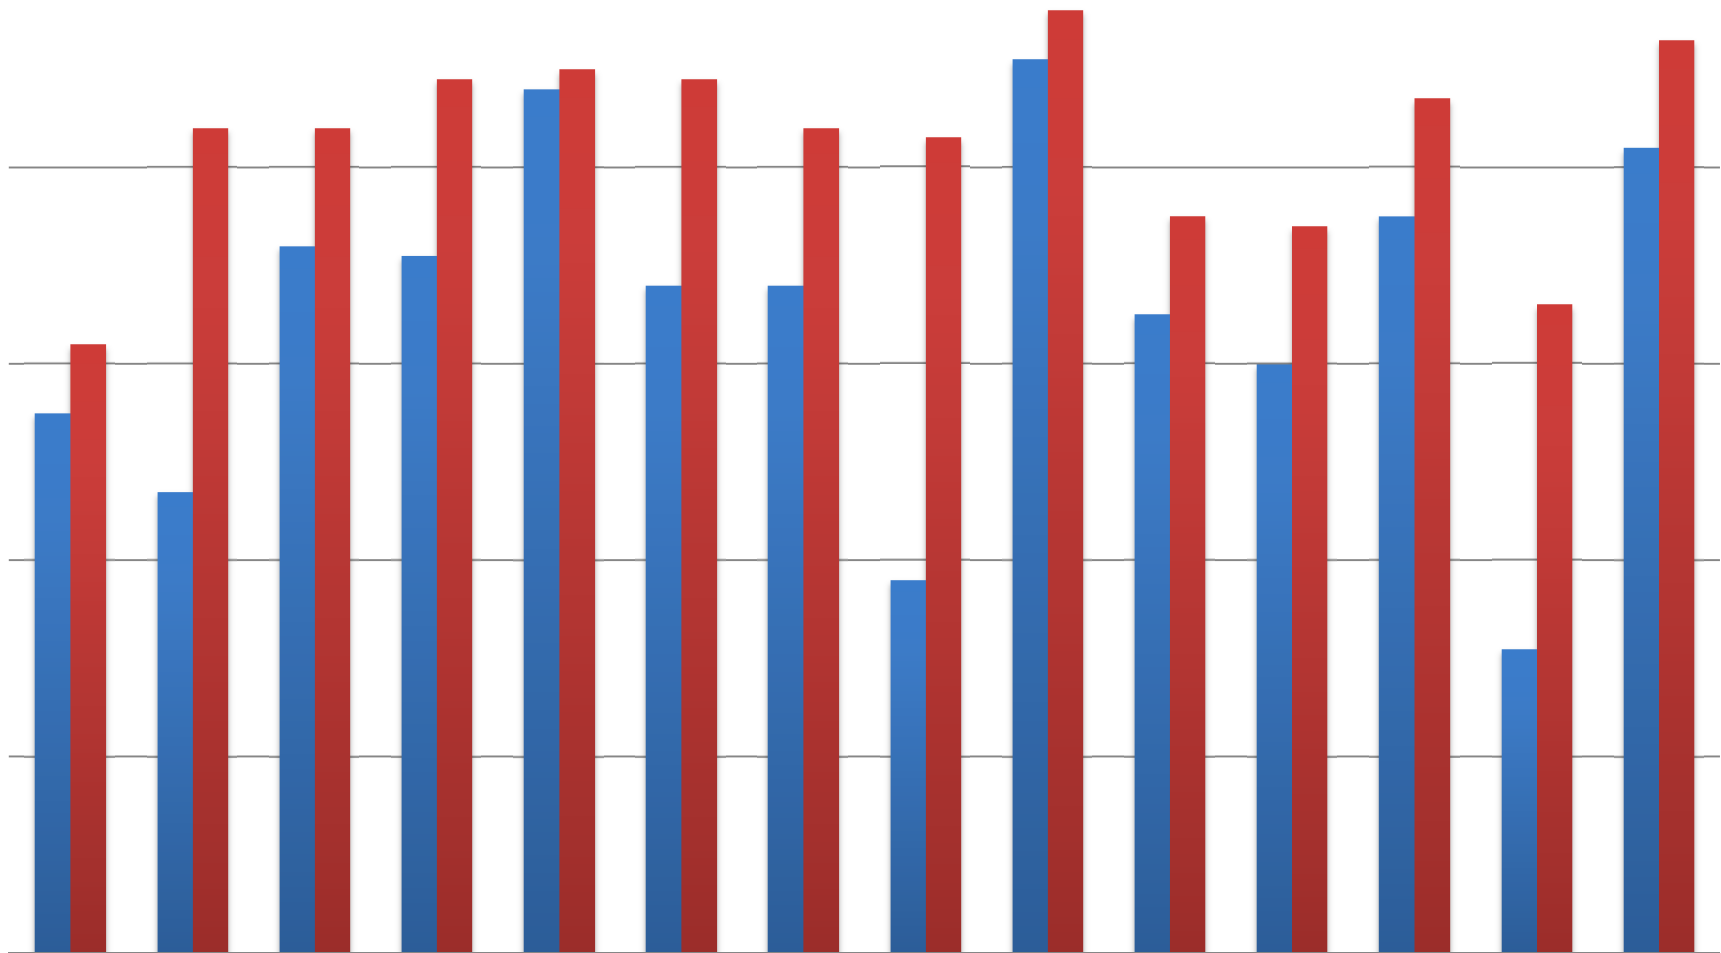

|             |    |    |    |    |    |    |    |    |    |    |    |    |    |    |
|-------------|----|----|----|----|----|----|----|----|----|----|----|----|----|----|
| ■ Pre-test  | 55 | 47 | 72 | 71 | 88 | 68 | 68 | 38 | 91 | 65 | 60 | 75 | 31 | 82 |
| ■ Post-test | 62 | 84 | 84 | 89 | 90 | 89 | 84 | 83 | 96 | 75 | 74 | 87 | 66 | 93 |

Supplement: MOESM4 [file 9543128]
